# Supplementary material for: Isolation and Characterization of NpCI, a New Metallocarboxypeptidase Inhibitor from the Marine Snail Nerita peloronta with Anti-Plasmodium falciparum Activity
Source: MDPI journal article supplement (doi:10.3390/md21020094), 2023-01-28
Supplement: s1 [file s1]

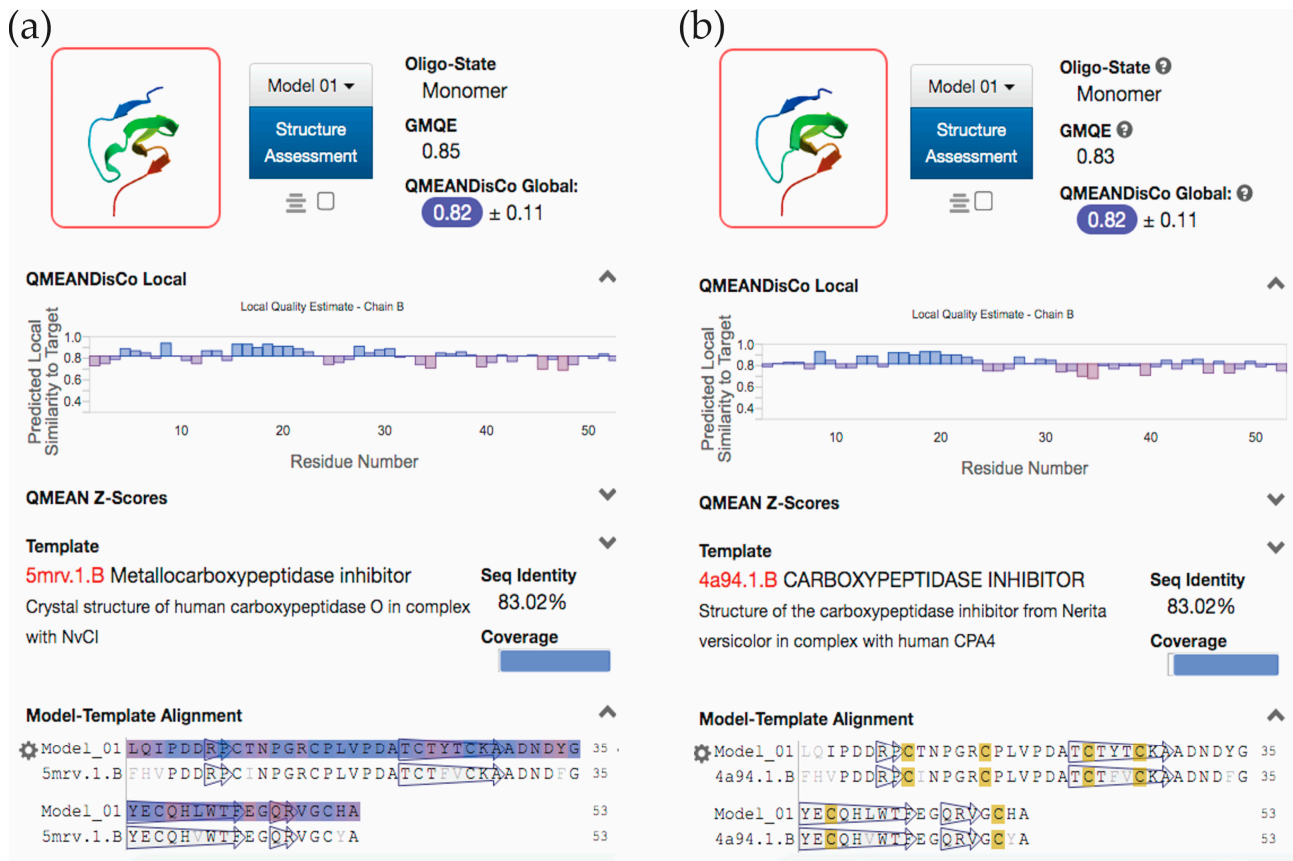

**Figure S2. Parameters Derived from the Modeling of NpCI to NvCI Crystal Structures** The modeling of NpCI from *Nerita perolonta* was performed from its protein sequence in the ExPASy/Swiss Modeller server [28], using as templates the structures of NvCI from *Nerita versicolor* taken from the detailed crystal structures of its complexes with (a) Carboxypeptidase O [37], and (b) Carboxypeptidase A4 [11], found at PDB with codes 5mrv.1.B. and 4a94.1.B. The derived results and parameters are shown below.
