# Supplementary material for: Isolation and Characterization of NpCI, a New Metallocarboxypeptidase Inhibitor from the Marine Snail Nerita peloronta with Anti-Plasmodium falciparum Activity
Source: MDPI journal article supplement (doi:10.3390/md21020094), 2023-01-28
Supplement: s1 [file s1]

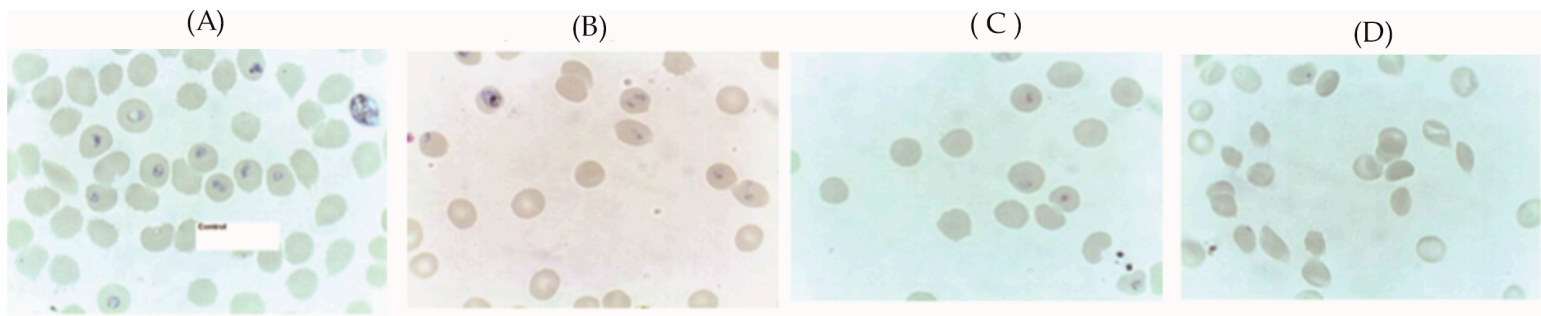

**Figure S1:** Representative microscopy images of *P. falciparum* Dd2 cultures, incubated or not with different concentrations of inhibitor: at 0.00, control (A); 0.88 (B); 8.80 (C) and 88,00 (D) mol/L of NpCl. Images were obtained from observation of Wright's-stained smears from cultures treated for 48 h with different concentrations of NpCl.
