# Supplementary material for: Isolation and Characterization of NpCI, a New Metallocarboxypeptidase Inhibitor from the Marine Snail Nerita peloronta with Anti-Plasmodium falciparum Activity
Source: MDPI journal article supplement (doi:10.3390/md21020094), 2023-01-28
Supplement: s1 [file s1]

**Table S1. Sets of NpCI Peptides from Trypsin and GluC Hydrolysis, Selected for Sequence Building.**

Fraction: mcE71\_Tryp\_5ng\_20220519.raw / Ion Source: ESI(nano-spray) ÷ Fragmentation Mode: CID, CAD (y and b ions) / MS & MS/MS Scan Modes: FT-ICR/Orbitrap. Analytical program, PEAKS DB (2016 vs; BSI-Thermo).  
The <Pep n<sup>o</sup>> column indicates the peptides displayed in the alignments of Fig.4, although all of them were used to derive the sequence.

**| Supporting Peptides |**

| Peptides (Trypsin-derived)             | -10lgP | Mass      | Length | ppm  | m/z      | z | RT    | Scans | Start | End | Pep n <sup>o</sup> | PTMs                                      |
|----------------------------------------|--------|-----------|--------|------|----------|---|-------|-------|-------|-----|--------------------|-------------------------------------------|
| C(+57.02)PLVPDATC(+57.02)TYTC(+57.02)K | 115.64 | 1684.7260 | 14     | 1.1  | 843.3712 | 2 | 42.32 | 1941  | 15    | 28  | 1                  | Carbamidomethyl                           |
| C(+58.01)PLVPDATC(+57.02)TYTC(+57.02)K | 53.86  | 1685.7100 | 14     | 11.9 | 843.8723 | 2 | 42.40 | 1946  | 15    | 28  | 1                  | Carboxymethyl (C);<br>Carbamidomethyl (C) |
| LQIPDDRPC(+57.02)TNPGR                 | 90.67  | 1637.7943 | 14     | 0.0  | 546.9387 | 3 | 38.40 | 1704  | 1     | 14  | 2                  | Carbamidomethyl(C)                        |
| LQ(+.98)IPDDRPC(+57.02)TNPGR           | 68.86  | 1638.7783 | 14     | 11.1 | 547.2728 | 3 | 38.43 | 1706  | 1     | 14  | 2                  | Deamidation (N,Q);<br>Carbamidomethyl (C) |
| AADNDYGYEC(+57.02)QHLWTFEGQR           | 90.40  | 2459.0237 | 20     | 0.7  | 820.6824 | 3 | 50.79 | 2449  | 29    | 48  | 3                  | Carbamidomethyl (C)                       |
| AADN(+.98)DYGYEC(+57.02)QHLWTFEGQR     | 53.81  | 2460.0076 | 20     | 7.9  | 821.0163 | 3 | 50.80 | 2450  | 29    | 48  | 3                  | Deamidation (N,Q);<br>Carbamidomethyl (C) |

Fraction: mcE71\_GluC\_25pg\_20220601.raw / Ion Source: ESI(nano-spray) ÷ Fragmentation Mode: CID, CAD (y and b ions) / MS & MS/MS Scan Modes: FT-ICR/Orbitrap. Analytical program, PEAKS DB (2016 vs; BSI-Thermo).  
The <Pep n<sup>o</sup>> column indicates the peptides displayed in the alignments of Fig.4, although all of them were used to derive the sequence.

**| Supporting Peptides |**

| Peptides (GluC-derived)                  | -10lgP | Mass      | Length | ppm  | m/z      | z | RT    | Scans | Start | End | Pep n <sup>o</sup> | PTM                 |
|------------------------------------------|--------|-----------|--------|------|----------|---|-------|-------|-------|-----|--------------------|---------------------|
| LQIPDDRPC(+57.02)TN                      | 73.38  | 1327.6190 | 11     | 2.8  | 664.8187 | 2 | 31.88 | 1608  | 1     | 11  |                    | Carbamidomethyl (C) |
| TC(+57.02)KAADNDYGYE                     | 61.23  | 1405.5455 | 12     | 1.8  | 703.7813 | 2 | 28.07 | 1182  | 26    | 37  |                    | Carbamidomethyl (C) |
| C(+57.02)QHLWTFE                         | 57.80  | 1119.4807 | 8      | 4.7  | 560.7502 | 2 | 40.96 | 2466  | 38    | 45  | 2Glc               | Carbamidomethyl (C) |
| PGRC(+57.02)PLVPDATC(+57.02)TYTC(+57.02) | 56.62  | 1866.8063 | 16     | -2.0 | 934.4086 | 2 | 35.94 | 1979  | 12    | 27  |                    | Carbamidomethyl (C) |

|                                      |       |           |    |      |          |   |       |      |    |    |             |                                        |
|--------------------------------------|-------|-----------|----|------|----------|---|-------|------|----|----|-------------|----------------------------------------|
| GQRVGC(+57.02)HA                     | 52.81 | 883.4083  | 8  | 2.4  | 442.7125 | 2 | 19.94 | 411  | 46 | 53 | <b>3Glc</b> | Carbamidomethyl (C)                    |
| KAADNDYGYE                           | 50.30 | 1144.4673 | 10 | 0.3  | 573.2411 | 2 | 27.45 | 1114 | 28 | 37 |             |                                        |
| PGRC(+57.02)PLVPD                    | 49.50 | 1009.5015 | 9  | -0.9 | 505.7575 | 2 | 31.74 | 1597 | 12 | 20 |             | Carbamidomethyl (C)                    |
| LQIPDDRPC(+57.02)TNPGRC(+57.02)PLVPD | 46.16 | 2319.1099 | 20 | -5.5 | 774.0397 | 3 | 37.83 | 2158 | 1  | 20 |             | Carbamidomethyl (C)                    |
| ATC(+57.02)TYTC(+57.02)KAADNDYGYE    | 45.37 | 2001.7721 | 17 | 0.3  | 668.2648 | 3 | 30.75 | 1490 | 21 | 37 |             | Carbamidomethyl (C)                    |
| C(+57.02)Q(+.98)HLWTFE               | 42.96 | 1120.4647 | 8  | 0.0  | 561.2396 | 2 | 41.78 | 2546 | 38 | 45 | <b>2Glc</b> | Carbamidomethyl(C);<br>Deamidation (Q) |
| KAADN(+.98)DYGYE.C                   | 40.46 | 1145.4513 | 10 | 0.4  | 573.7332 | 2 | 28.12 | 1188 | 28 | 37 |             | Deamidation (Q)                        |
| C(+57.02)QHLW(+15.99)TFE             | 38.03 | 1135.4757 | 8  | 0.3  | 568.7453 | 2 | 38.69 | 2249 | 38 | 45 | <b>2Glc</b> | Carbamidomethyl(C);<br>Oxidation (W)   |
| LQIPDDRPC(+57.02)TN(-18.01)          | 37.31 | 1309.6085 | 11 | -0.8 | 655.8110 | 2 | 32.24 | 1654 | 1  | 11 |             | Carbamidomethyl(C);<br>Dehydration (N) |
| C(+57.02)QH(+15.99)LWTFE             | 37.15 | 1135.4757 | 8  | 0.8  | 568.7456 | 2 | 40.78 | 2450 | 38 | 45 | <b>2Glc</b> | Carbamidomethyl(C);<br>Oxidation (W)   |
| NPGRCPLVPDATCTYTC(+57.02)KAADNDYGYE  | 31.49 | 2993.2629 | 27 | -3.1 | 998.7585 | 3 | 37.21 | 2094 | 11 | 37 | <b>1Glc</b> | Carbamidomethyl (C)                    |
